# Supplementary material for: Intermolecular Interactions in G Protein-Coupled Receptor Allosteric Sites at the Membrane Interface from Molecular Dynamics Simulations and Quantum Chemical Calculations
Source: PubMed Central journal article supplement (PMC9554917; doi:10.1021/acs.jcim.2c00788), 2022-09-30
Supplement: ci2c00788_si_001.pdf [file ci2c00788_si_001.pdf]

# Supporting Information

**Intermolecular interactions in G protein-coupled receptor allosteric sites at the membrane interface from molecular dynamics simulations and quantum chemical calculations.**

Tianyi Ding, Dmitry S. Karlov, Almudena Pino-Angeles and Irina G. Tikhonova

School of Pharmacy, Medical Biology Centre, Queen's University Belfast, Belfast, Northern Ireland, BT9 7BL, UK

\* Correspondence, Email: [i.tikhonova@qub.ac.uk](mailto:i.tikhonova@qub.ac.uk)

**Table S1. The average ligand-residue interaction energy, involving van der Waals and electrostatic components in PAR2 from the MD simulations in different lipid compositions.**

| Residue              | POPC                    |                         |                           | DMPC                    |                         |                           | POPC + Cholesterol      |                         |                           |
|----------------------|-------------------------|-------------------------|---------------------------|-------------------------|-------------------------|---------------------------|-------------------------|-------------------------|---------------------------|
|                      | $E_{vdW}$ ,<br>kcal/mol | $E_{ele}$ ,<br>kcal/mol | $E_{total}$ ,<br>kcal/mol | $E_{vdW}$ ,<br>kcal/mol | $E_{ele}$ ,<br>kcal/mol | $E_{total}$ ,<br>kcal/mol | $E_{vdW}$ ,<br>kcal/mol | $E_{ele}$ ,<br>kcal/mol | $E_{total}$ ,<br>kcal/mol |
| Y210 <sup>4.61</sup> | -4.7                    | -5.1                    | -9.5                      | -3.6                    | -4.9                    | -8.5                      | -5.0                    | -3.9                    | -8.9                      |
| F154 <sup>3.31</sup> | -6.4                    | -1.8                    | -8.2                      | -6.7                    | -1.7                    | -8.4                      | -7.0                    | -2.2                    | -9.2                      |
| L203 <sup>4.54</sup> | -5.5                    | -0.8                    | -6.3                      | -4.6                    | 0.0                     | -4.6                      | -4.8                    | -0.1                    | -4.9                      |
| W199 <sup>4.50</sup> | -5.4                    | -0.6                    | -6.0                      | -6.2                    | -0.8                    | -7.0                      | -5.7                    | -0.7                    | -6.4                      |
| A120 <sup>2.49</sup> | -1.2                    | -2.8                    | -3.9                      | -1.2                    | -2.3                    | -3.5                      | -1.0                    | -2.7                    | -3.8                      |
| G157 <sup>3.34</sup> | -2.2                    | -1.4                    | -3.6                      | -1.7                    | -0.8                    | -2.6                      | -2.1                    | -1.2                    | -3.3                      |
| I207 <sup>4.58</sup> | -2.4                    | -0.8                    | -3.2                      | -0.6                    | -0.2                    | -0.8                      | 0.0                     | 0.0                     | 0.0                       |
| L123 <sup>2.52</sup> | -3.7                    | 1.0                     | -2.7                      | -3.4                    | 0.8                     | -2.7                      | -3.7                    | 0.9                     | -2.7                      |
| T206 <sup>4.57</sup> | -1.4                    | -0.5                    | -1.8                      | -1.2                    | -0.4                    | -1.6                      | -0.8                    | -0.4                    | -1.2                      |
| I202 <sup>4.53</sup> | -1.8                    | 0.2                     | -1.6                      | -1.9                    | 0.4                     | -1.5                      | -1.8                    | 0.5                     | -1.3                      |
| C161 <sup>3.38</sup> | -0.9                    | -0.3                    | -1.2                      | -0.8                    | 0.1                     | -0.7                      | -1.3                    | -0.2                    | -1.3                      |
| Lipid tail           | -8.8                    | 0.0                     | -8.8                      | -7.9                    | 0.0                     | -7.9                      | -5.4                    | 0.0                     | -5.4                      |
| Lipid tail           | -3.9                    | -0.1                    | -4.1                      | -2.4                    | 0.0                     | -2.4                      | -5.0                    | -0.1                    | -5.1                      |
| Headgroup            | -1.7                    | -1.5                    | -3.2                      | -0.6                    | -0.9                    | -1.5                      | -                       | -                       | -                         |
| Lipid tail           | -1.9                    | -0.1                    | -2.0                      | -1.7                    | 0.0                     | -1.7                      | -1.9                    | 0.0                     | -1.9                      |
| Lipid tail           | -1.1                    | 0.0                     | -1.1                      | -1.5                    | 0.0                     | -1.5                      | -1.0                    | 0.0                     | -1.9                      |

**Table S2. Hydrogen bond occupancy of the most critical hydrophilic residue in the ligand-bound and unbound receptor in percentage.** The threshold for a hydrogen bond was a distance of 3.2 Å and an angle of 120° between donor and acceptor atoms.

| System Simulation Runs | PAR2        |            | C5aR1           |            | GCGR         |            |              |            |
|------------------------|-------------|------------|-----------------|------------|--------------|------------|--------------|------------|
|                        | Y210–AZ3451 | Y210–Empty | W213–NDT9513727 | W213–Empty | R346–MK-0893 | R346–Empty | N404–MK-0893 | N404–Empty |
| POPC                   | 65±7        | 91±3       | 91±3            | 42±7       | 97±4         | 100        | 80±4         | 100        |
| DMPC                   | 53±19       | 99±1       | 34±1            | 85±8       | 100          | 100        | 90±1         | 100        |
| POPC_Chol              | 67±21       | 63±14      | 90±0            | 34±8       | 100          | 100        | 90±8         | 100        |
| POPC-5NDD              |             | 88±4       |                 |            |              |            |              |            |
| POPC_6C1Q              |             |            | 93              |            |              |            |              |            |
| DMPC-6C1Q              |             |            | 90              |            |              |            |              |            |
| POPC-Chol_6C1Q         |             |            | 92              |            |              |            |              |            |

**Table S3. The decomposition of the pairwise interaction energy of PAR2 residue backbone amide or sidechain and AZ3451 derived from SAPT0 calculations. N is a number of non-hydrogen atoms in a protein fragment.**

| Receptor Fragment          | Electrostatics, kcal/mol | Exchange, kcal/mol | Induction L→R*, kcal/mol | Induction R→L*, kcal/mol | Dispersion, kcal/mol | Total, kcal/mol | Total / N**, kcal/mol |
|----------------------------|--------------------------|--------------------|--------------------------|--------------------------|----------------------|-----------------|-----------------------|
| Y210-sidechain             | -8.58                    | 9.31               | -1.62                    | -1.53                    | -10.35               | -12.77          | -1.60                 |
| W199-sidechain             | -4.3                     | 9.8                | -0.1                     | -0.23                    | -11.11               | -6.85           | -0.69                 |
| F154-amide-F155            | -5.5                     | 2.34               | -1.06                    | -0.32                    | -1.37                | -5.91           | -1.97                 |
| L203-sidechain             | -3.36                    | 9.32               | -0.2                     | -0.27                    | -9.39                | -3.91           | -0.98                 |
| W199-amide-L200            | -3.72                    | 4.29               | -0.67                    | -0.25                    | -2.54                | -2.89           | -0.96                 |
| A120-amide-D121            | -5.37                    | 6.15               | -0.57                    | -0.79                    | -1.77                | -2.35           | -0.78                 |
| L203-amide-L204            | -1.14                    | 0.02               | -0.16                    | -0.02                    | -0.46                | -1.76           | -0.59                 |
| F154-sidechain             | -3.16                    | 8.98               | -0.5                     | -0.36                    | -6.35                | -1.4            | -0.2                  |
| L119-amide-A120            | -0.5                     | 0.04               | -0.13                    | -0.01                    | -0.28                | -0.89           | -0.2                  |
| L123-sidechain             | -2.15                    | 9.8                | -0.01                    | -0.31                    | -8.08                | -0.74           | -0.19                 |
| C161-sidechain             | -3.04                    | 6.69               | -0.24                    | -0.61                    | -3.49                | -0.7            | -0.35                 |
| T206-sidechain             | -0.15                    | 0.01               | 0.05                     | -0.03                    | -0.55                | -0.68           | -0.23                 |
| Y156-amide-G157            | -0.15                    | 0.01               | -0.13                    | -0.01                    | -0.36                | -0.64           | -0.21                 |
| L202-sidechain             | -1.33                    | 4.39               | -0.18                    | -0.13                    | -3.25                | -0.5            | -0.13                 |
| I198-amide-W199            | 0.16                     | 0.01               | -0.29                    | 0                        | -0.28                | -0.4            | -0.13                 |
| T206-amide-I207            | 0.1                      | 0.01               | -0.24                    | -0.02                    | -0.24                | -0.39           | -0.13                 |
| D121-amide-L122            | -0.1                     | 0                  | -0.09                    | -0.01                    | -0.06                | -0.26           | -0.08                 |
| I207-sidechain             | 0.09                     | 2.08               | -0.02                    | -0.22                    | -2.19                | -0.26           | -0.07                 |
| G153-amide-F154            | 0.25                     | 0.01               | 0.19                     | -0.03                    | -0.47                | -0.05           | -0.01                 |
| V205-amide-T206            | 0.16                     | 0                  | -0.06                    | 0                        | -0.08                | 0.02            | 0.00                  |
| C161-amide-S162            | 0.27                     | 0                  | 0.17                     | 0                        | -0.07                | 0.37            | 0.12                  |
| G157-amide-N158            | -1.77                    | 6.47               | -0.15                    | -0.23                    | -3.93                | 0.41            | 0.14                  |
| L209-amide-Y210            | 0.52                     | 0                  | 0.07                     | -0.01                    | -0.11                | 0.47            | 0.15                  |
| A120-sidechain             | 0.71                     | 0.45               | 0.11                     | -0.04                    | -0.74                | 0.48            | 0.48                  |
| Y160-amide-C161            | 0.43                     | 0                  | 0.2                      | -0.01                    | -0.14                | 0.5             | 0.16                  |
| Y210-amide-V211            | 0.67                     | 0                  | 0.04                     | -0.01                    | -0.19                | 0.5             | 0.16                  |
| I207-amide-sidechainPro208 | 1.02                     | 0.02               | -0.07                    | -0.02                    | -0.32                | 0.62            | 0.09                  |
| L123-amide-S124            | 0.83                     | 0.02               | 0.21                     | -0.03                    | -0.33                | 0.7             | 0.23                  |
| L122-amide-L123            | 0.75                     | 0                  | 0.16                     | -0.01                    | -0.13                | 0.77            | 0.25                  |
| L202-amide-L203            | -0.09                    | 3.1                | 0.22                     | -0.15                    | -2.07                | 1.01            | 0.34                  |

\*L→R/ R→L: Ligand→Receptor/Receptor→Ligand; \*\*Total/N is fragment efficiency

**Table S4.** The decomposition of the pairwise interaction energy between the PAR2 receptor fragments and the AZ3451 amidobenzonitrile (ABN), benzimidazole (BI), or bromobenzodioxol (BBDO) fragments derived from SAPT0 calculations.

| Receptor Fragment | Ligand Fragment | Electrostatics, kcal/mol | Exchange, kcal/mol | Induction L→R, kcal/mol | Induction R→L, kcal/mol | Dispersion, kcal/mol | Total, kcal/mol |
|-------------------|-----------------|--------------------------|--------------------|-------------------------|-------------------------|----------------------|-----------------|
| Y210-sidechain    | ABN             | -1.94                    | 4.19               | -0.56                   | -1.13                   | -5.50                | -4.94           |
| Y210-sidechain    | BI              | -9.25                    | 9.49               | -1.49                   | -0.91                   | -5.47                | -7.62           |
| F154-amide-F155   | BBDO            | -4.37                    | 2.34               | -1.12                   | -0.28                   | -1.39                | -4.83           |
| A120-amide-D121   | BBDO            | -4.45                    | 6.15               | -0.54                   | -0.78                   | -1.84                | -1.46           |

**Table S5.**  $Q_{CT}$  devised from natural population analysis for atom-pairwise contacts in the AZ3451-PAR2 complex, the distance and angle of these contacts from the X-ray and optimized structures.

| Two atom contact (receptor-ligand) | Interacting orbitals | $Q_{CT}$ , a.u. | Optimized distance, Å | Optimized angle, ° (expected from VSEPR') | X-ray distance, Å | X-ray angle, ° | VdW sum, Å |
|------------------------------------|----------------------|-----------------|-----------------------|-------------------------------------------|-------------------|----------------|------------|
| A120b(O-H)C <sup>sp3</sup>         | n(O) → σ*(H-C)       | 0.0100          | 2.12                  | 115 (120)                                 | 2.44              | 96             | 2.72       |
| F154b(O-H)C <sup>sp3</sup>         | n(O) → σ*(H-C)       | 0.0024          | 2.38                  | 131 (120)                                 | 3.05              | 133            | 2.72       |
| W199b(O-Br)                        | n(O) → σ*(Br-C)      | 0.0032          | 3.08                  | 135 (120)                                 | 2.97              | 145            | 3.05       |
| Y210O(H-N) <sup>sp2</sup>          | n(N) → σ*(H-O)       | 0.0128          | 2.25                  | 151 (120)                                 | 2.91              | 150            | 2.75       |
| F154C(H-O) <sup>sp2</sup>          | n(O) → σ*(H-C)       | 0.0053          | 2.13                  | 131 (104)                                 | 2.35              | 91             | 2.72       |

\*VSEPR – Valence shell electron pair repulsion (VSEPR) theory

n(O/N) is the orbital corresponding to a lone pair of electrons. σ\*(H-C/H-O/Br-C) is a non-bonding orbital.

$Q_{CT}$  is charge transfer from the occupied orbital with a lone pair of electrons to the non-bonding orbital.

**Table S6.** The average allosteric site-lipid interaction energy, involving van der Waals and electrostatic components in kcal/mol from the MD simulations of the receptor empty form.

| Receptor     | Lipid      | POPC      |           |             | DMPC      |           |             | POPC + Cholesterol |           |             |
|--------------|------------|-----------|-----------|-------------|-----------|-----------|-------------|--------------------|-----------|-------------|
|              |            | $E_{vdW}$ | $E_{ele}$ | $E_{total}$ | $E_{vdW}$ | $E_{ele}$ | $E_{total}$ | $E_{vdW}$          | $E_{ele}$ | $E_{total}$ |
| <b>PAR2</b>  | Headgroup  | -0.4      | -2.4      | -2.9        | -2.7      | -8.6      | -11.3       | 0                  | 0         | 0           |
|              | Lipid tail | -15.3     | -0.6      | -15.9       | -9.8      | -0.1      | -10.0       | -11.5              | 0         | -11.5       |
|              | Lipid tail | -6.0      | -0.2      | -6.2        | -1.8      | 0.1       | -1.6        | -5.4               | -0.2      | -5.6        |
|              | Lipid tail | -3.1      | 0         | -3.2        | -0.4      | -0.9      | -1.4        | -1.0               | 0         | -1.0        |
|              | Lipid tail | -1.4      | 0         | -1.4        | 0         | 0         | 0           | -0.3               | -0.3      | -0.6        |
| <b>C5aR1</b> | Lipid tail | -5.1      | -0.1      | -5.2        | -15.0     | -0.3      | -15.2       | -7.7               | -0.2      | -7.9        |
|              | Lipid tail | -5.3      | -0.1      | -5.4        | -6.5      | -0.2      | -6.7        | -3.8               | 0.1       | -3.9        |
|              | Lipid tail | -3.9      | -0.1      | -4.0        | -4.9      | -0.3      | -5.2        | -3.7               | 0.1       | -3.8        |
|              | Lipid tail | -2.3      | 0         | -2.3        | -2.4      | 0         | -2.3        | -3.5               | -0.1      | -3.6        |
|              | Lipid tail | -2.1      | 0         | -2.2        | -2.1      | 0         | -2.2        | -2.3               | -0.1      | -2.4        |
|              | Lipid tail | -1.7      | 0         | -1.7        | -1.7      | 0         | -1.7        | -1.7               | 0         | -1.7        |
| <b>GCGR</b>  | Headgroup  | -2.8      | -64.0     | -67.0       | -3.5      | -83.2     | -86.6       | -1.9               | -68.1     | -70.0       |
|              | Headgroup  | -2.6      | -60.0     | -63.0       | -8.1      | -77.1     | -85.1       | -0.8               | -48.3     | -49.0       |
|              | Headgroup  | -1.2      | -8.1      | -9.3        | -0.6      | -55.8     | -56.4       | -0.4               | -6.3      | -6.7        |
|              | Headgroup  | -0.4      | -3.9      | -4.3        | 0         | -2.0      | -2.0        | -0.2               | -1.4      | -1.6        |
|              | Headgroup  | -0.2      | -2.3      | -2.5        | 0         | 0         | 0           | 0                  | 0         | 0           |
|              | Headgroup  | 0         | -1.5      | -1.5        | 0         | 0         | 0           | 0                  | 0         | 0           |
|              | Lipid tail | -2.4      | -0.2      | -2.6        | -7.0      | -0.5      | -7.5        | -6.0               | 0.2       | -5.8        |
|              | Lipid tail | 0         | 0         | 0           | -4.4      | -0.4      | -4.7        | -1.6               | -0.1      | -1.7        |

**Table S7. The average water occupancy in the empty form of PAR2 and C5aR1 allosteric sites from the MD simulations.** The threshold for a hydrogen bond was a distance of 3.5 Å and an angle of 135° between donor and acceptor atoms. A120, F154 and G157 were selected in PAR2. In C5aR1 water molecules were monitored in three sites: (1) T129, A156 and V159; (2) T217 and (3) L209.

| <b>Systems</b> | <b>% Occupancy</b> |
|----------------|--------------------|
| PAR2-E         |                    |
| POPC           | 51%±0.1            |
| DMPC           | 42%±0.2            |
| POPC-Chol      | 14%±0.2            |
| PAR2_5NND      | 19%±0.1            |
| C5aR1-E        |                    |
| POPC (1)       | 28%±0.3            |
| DMPC (1)       | 26%±0.1            |
| POPC-Chol (1)  | 8%±0.1             |
| POPC (2)       | 12%±0.1            |
| DMPC (2)       | 59%±0.2            |
| POPC-Chol (2)  | 0.0%±0.0           |
| POPC (3)       | 20%±0.1            |
| DMPC (3)       | 2%±0.2             |
| POPC-Chol (3)  | 5%±0.01            |

**Table S8. Druggability, volume and solvent accessible surface area (SASA) of allosteric binding sites in PAR2, C5aR1 and GCGR in the ligand-bound (-L) and empty forms (-E) in three membrane compositions.** Druggability and volume of the cavities were assessed by the MD-pocket program using the Fpocket druggability criteria. The cavities were selected based on the selection of only the receptor residues shown in the Methods<sup>1</sup> or the receptor residues together with lipid atoms at the distance of 6 Å from these residues<sup>2</sup>. SASA<sub>phil</sub>, and SASA<sub>phob</sub> are solvent-accessible surface area for the hydrophilic and hydrophobic residues.

| Systems          | Pocket type <sup>1</sup> | Pocket type <sup>2</sup> | Volume <sup>1</sup> ,<br>Å <sup>3</sup> | Volume <sup>2</sup> ,<br>Å <sup>3</sup> | SASA <sub>phil</sub> ,<br>Å <sup>2</sup> | SASA <sub>phob</sub> ,<br>Å <sup>2</sup> |
|------------------|--------------------------|--------------------------|-----------------------------------------|-----------------------------------------|------------------------------------------|------------------------------------------|
| <b>PAR2</b>      |                          |                          |                                         |                                         |                                          |                                          |
| POPC-L           | Druggable                | Druggable                | 361 ± 52                                | 893±134                                 | 233±16                                   | 1031±34                                  |
| POPC-E           | Druggable                | No pocket                | 519 ± 107                               | No pocket                               | 215±28                                   | 998±54                                   |
| DMPC-L           | Druggable                | Druggable                | 341 ± 51                                | 913±153                                 | 228±23                                   | 956±38                                   |
| DMPC-E           | Druggable                | No pocket                | 404 ± 75                                | No pocket                               | 237±30                                   | 986±42                                   |
| POPC_Chol-L      | Druggable                | Druggable                | 354 ± 47                                | 792±205                                 | 226±21                                   | 994±37                                   |
| POPC_Chol-E      | Druggable                | No pocket                | 281 ± 85                                | No pocket                               | 187±23                                   | 975±50                                   |
| <b>C5aR1</b>     |                          |                          |                                         |                                         |                                          |                                          |
| POPC-5O9H_L      | Non-druggable            | Druggable                | 300 ± 92                                | 809±178                                 | 250±20                                   | 978±29                                   |
| POPC-5O9H_E      | Non-druggable            | No pocket                | 218 ± 103                               | No pocket                               | 259±28                                   | 1010±45                                  |
| DMPC-5O9H_L      | Non-druggable            | Druggable                | 275 ± 119                               | 970±136                                 | 261±22                                   | 989±38                                   |
| DMPC-5O9H_E      | Non-druggable            | No pocket                | 417 ± 118                               | No pocket                               | 273±21                                   | 1025±48                                  |
| POPC_Chol-5O9H_L | Druggable                | Druggable                | 238 ± 72                                | 819±152                                 | 281±22                                   | 1123±66                                  |
| POPC_Chol-5O9H_E | Non-druggable            | No pocket                | 197 ± 112                               | No pocket                               | 256±28                                   | 968±49                                   |
| POPC_6C1Q-L      | Non-druggable            | Druggable                | 362±84                                  | 885±194                                 | 170±16                                   | 1523±78                                  |
| DMPC_6C1Q-L      | Non-druggable            | Druggable                | 349±94                                  | 1124±186                                | 195±18                                   | 1618±88                                  |
| POPC_Chol_6C1Q-L | Non-druggable            | Druggable                | 326±87                                  | 953±180                                 | 202±16                                   | 1495±98                                  |
| <b>GCGR</b>      |                          |                          |                                         |                                         |                                          |                                          |
| POPC-L           | Non-druggable            | Druggable                | 374 ± 82                                | 1442±245                                | 415±42                                   | 670±43                                   |
| POPC-E           | Non-druggable            | No pocket                | 350 ± 141                               | No pocket                               | 558±102                                  | 772±59                                   |
| DMPC-L           | Non-druggable            | Druggable                | 401 ± 84                                | 1109±170                                | 401±49                                   | 701±49                                   |
| DMPC-E           | Non-druggable            | No pocket                | 274 ± 113                               | No pocket                               | 464±98                                   | 784±63                                   |
| POPC_Chol-L      | Non-druggable            | Druggable                | 373 ± 75                                | 1249±219                                | 390±41                                   | 715±38                                   |
| POPC_Chol-E      | Non-druggable            | No pocket                | 401 ± 84                                | No pocket                               | 531±89                                   | 686±48                                   |

**Table S9. The average ligand-residue interaction energy, involving van der Waals and electrostatic components in C5aR1 (PDB ID: 6C1Q) from the MD simulations in different lipid compositions.**

| Residue                     | POPC                 |                      |                        | DMPC                 |                      |                        | POPC + Cholesterol   |                      |                        |
|-----------------------------|----------------------|----------------------|------------------------|----------------------|----------------------|------------------------|----------------------|----------------------|------------------------|
|                             | $E_{vdW}$ , kcal/mol | $E_{ele}$ , kcal/mol | $E_{total}$ , kcal/mol | $E_{vdW}$ , kcal/mol | $E_{ele}$ , kcal/mol | $E_{total}$ , kcal/mol | $E_{vdW}$ , kcal/mol | $E_{ele}$ , kcal/mol | $E_{total}$ , kcal/mol |
| <b>W213</b> <sup>5.49</sup> | -5.0                 | -10.8                | -15.9                  | -5.0                 | -11.1                | -16.1                  | -4.8                 | -11.2                | -16.0                  |
| <b>L125</b> <sup>3.41</sup> | -5.4                 | -1.0                 | -6.5                   | -4.9                 | -1.4                 | -6.3                   | -4.9                 | -1.3                 | -6.2                   |
| <b>L209</b> <sup>5.45</sup> | -2.5                 | -2.3                 | -4.8                   | -2.3                 | -2.3                 | -4.7                   | -2.5                 | -2.3                 | -4.8                   |
| <b>V159</b> <sup>4.48</sup> | -2.5                 | -0.4                 | -4.8                   | -2.5                 | -0.1                 | -2.6                   | -2.4                 | -0.1                 | -2.5                   |
| <b>T129</b> <sup>3.45</sup> | -2.1                 | -1.7                 | -3.8                   | -1.2                 | -1.2                 | -2.4                   | -2.1                 | -1.0                 | -3.1                   |
| <b>L163</b> <sup>4.52</sup> | -2.4                 | 0.0                  | -2.4                   | -2.2                 | 0.0                  | -2.2                   | -2.4                 | -0.1                 | -2.5                   |
| <b>T217</b> <sup>5.53</sup> | -1.1                 | -1.2                 | -2.3                   | -1.0                 | -1.0                 | -2.0                   | -0.9                 | -1.2                 | -2.1                   |
| <b>P214</b> <sup>5.50</sup> | -2.6                 | 0.3                  | -2.2                   | -2.6                 | 0.2                  | -2.4                   | -2.3                 | 0.2                  | -2.1                   |
| <b>A156</b> <sup>4.45</sup> | -1.1                 | -1.0                 | -2.1                   | -1.0                 | -1.4                 | -2.4                   | -1.0                 | -1.3                 | -2.3                   |
| <b>A128</b> <sup>3.44</sup> | 0.4                  | -2.2                 | -1.8                   | -2.5                 | 0.4                  | -2.1                   | -2.6                 | 0.3                  | -2.3                   |
| <b>Y121</b> <sup>3.37</sup> | -0.4                 | -0.7                 | -1.1                   | 0                    | 0                    | 0                      | -0.3                 | -0.7                 | 1.0                    |
| <b>I124</b> <sup>3.40</sup> | -1.0                 | 0.3                  | -0.7                   | -1.7                 | 0.0                  | -1.7                   | -1.7                 | 0.1                  | -1.6                   |
| <b>Lipid tail</b>           | -2.2                 | 0.0                  | -2.2                   | -6.0                 | -0.1                 | -6.1                   | -6.1                 | -0.1                 | -6.2                   |
| <b>Lipid tail</b>           | -1.7                 | 0.0                  | -1.7                   | -2.2                 | 0.0                  | -2.2                   | -2.9                 | 0.0                  | -3.0                   |
| <b>Lipid tail</b>           | -1.5                 | 0.0                  | -1.5                   | -0.6                 | 0.0                  | -0.6                   | -1.8                 | -0.1                 | -1.9                   |

**Table S10. The average ligand-residue interaction energy, involving van der Waals and electrostatic components in C5aR1 (PDB ID: 5O9H) from the MD simulations in different lipid compositions.**

| Residue                     | POPC                 |                      |                        | DMPC                 |                      |                        | POPC + Cholesterol   |                      |                        |
|-----------------------------|----------------------|----------------------|------------------------|----------------------|----------------------|------------------------|----------------------|----------------------|------------------------|
|                             | $E_{vdW}$ , kcal/mol | $E_{ele}$ , kcal/mol | $E_{total}$ , kcal/mol | $E_{vdW}$ , kcal/mol | $E_{ele}$ , kcal/mol | $E_{total}$ , kcal/mol | $E_{vdW}$ , kcal/mol | $E_{ele}$ , kcal/mol | $E_{total}$ , kcal/mol |
| <b>W213</b> <sup>5.49</sup> | -5.2                 | -11.0                | -16.2                  | -3.4                 | -4.5                 | -7.9                   | -5.3                 | -10.6                | -15.9                  |
| <b>L125</b> <sup>3.41</sup> | -4.6                 | -0.9                 | -5.5                   | -3.9                 | -1.3                 | -5.2                   | -4.2                 | -0.8                 | -5.0                   |
| <b>L209</b> <sup>5.45</sup> | -2.8                 | -2.2                 | -5.0                   | -1.5                 | -0.7                 | -2.2                   | -2.6                 | -1.9                 | -4.5                   |
| <b>L163</b> <sup>4.52</sup> | -2.7                 | 0.2                  | -2.5                   | -1.1                 | 0.3                  | -0.8                   | -2.3                 | 0.3                  | -2.0                   |
| <b>T217</b> <sup>5.53</sup> | -1.1                 | -1.2                 | -2.3                   | -2.4                 | -0.2                 | -2.5                   | -1.1                 | -1.0                 | -2.1                   |
| <b>P214</b> <sup>5.50</sup> | -2.4                 | 0.3                  | -2.1                   | -1.4                 | 0.8                  | 0.6                    | -2.5                 | 0.2                  | -2.3                   |
| <b>T129</b> <sup>3.45</sup> | -1.6                 | -0.5                 | -2.1                   | -4.0                 | -0.7                 | -4.7                   | -1.9                 | -0.7                 | -2.5                   |
| <b>A128</b> <sup>3.44</sup> | -2.2                 | 0.3                  | -1.9                   | -3.9                 | -1.3                 | -5.2                   | -2.4                 | 0.2                  | -2.3                   |
| <b>V159</b> <sup>4.48</sup> | -1.6                 | -0.2                 | -1.8                   | -2.1                 | 0                    | -2.1                   | -2.0                 | -0.6                 | -2.6                   |
| <b>I124</b> <sup>3.40</sup> | -1.5                 | 0.3                  | -1.2                   | -0.8                 | -0.4                 | -1.2                   | -1.5                 | 0.1                  | -1.4                   |
| <b>Y121</b> <sup>3.37</sup> | -0.4                 | -0.8                 | -1.2                   | 0                    | 0                    | 0                      | 0                    | 0                    | 0                      |
| <b>A156</b> <sup>4.45</sup> | -0.5                 | -0.6                 | -1.1                   | 0                    | 0                    | 0                      | -0.7                 | -0.2                 | -1.0                   |
| <b>Lipid tail</b>           | -2.4                 | 0                    | -2.4                   | -5.4                 | 0                    | -5.4                   | -4.0                 | 0                    | -4.0                   |
| <b>Lipid tail</b>           | -1.8                 | 0                    | -1.8                   | -5.4                 | 0                    | -5.4                   | -2.5                 | 0                    | -2.5                   |
| <b>Lipid tail</b>           | -1.5                 | 0                    | -1.5                   | -5.3                 | 0                    | -5.3                   | -2.2                 | 0                    | -2.2                   |
| <b>Lipid tail</b>           | -1.3                 | 0                    | -1.3                   | -1                   | 0                    | -1                     | -1.8                 | 0                    | -1.8                   |
| <b>Lipid tail</b>           | -1.0                 | 0                    | -1.0                   | -1                   | 0                    | -1                     | -1.7                 | 0                    | -1.7                   |
| <b>Headgroup</b>            | 0                    | 0                    | 0                      | -6.2                 | -3.5                 | -9.7                   | -1.0                 | 0                    | -1.0                   |



**Table S11. The decomposition of the pairwise interaction energy of a C5aR1 residue backbone or sidechain and NDT9513727 derived from SAPT0 calculations. N is a number of non-hydrogen atoms in a protein fragment.**

| Receptor Fragment                    | Electrostatics, kcal/mol | Exchange, kcal/mol | Induction L→R*, kcal/mol | Induction R→L*, kcal/mol | Dispersion, kcal/mol | Total, kcal/mol | Total / N**, kcal/mol |
|--------------------------------------|--------------------------|--------------------|--------------------------|--------------------------|----------------------|-----------------|-----------------------|
| W213-sidechain                       | -19.94                   | 24.75              | -5.79                    | -2.27                    | -13.12               | -16.37          | -1.64                 |
| A156-amide-C157                      | -4.27                    | 2.82               | -0.33                    | -0.27                    | -1.29                | -3.33           | -1.11                 |
| T129-sidechain                       | -3.63                    | 3.1                | -0.12                    | -0.22                    | -2.14                | -3.02           | -1.00                 |
| L209-amide-G210                      | -5.05                    | 4.6                | -0.29                    | -0.19                    | -2.04                | -2.96           | -0.99                 |
| L125-amide-L126                      | -1.07                    | 0.18               | -0.88                    | -0.11                    | -0.01                | -2.56           | -0.85                 |
| L125-sidechain                       | -1.67                    | 5.83               | 0                        | -0.33                    | -6.28                | -2.45           | -0.61                 |
| T217-sidechain                       | -2.58                    | 3.72               | -1.2                     | 0.19                     | -1.96                | -2.2            | -0.73                 |
| Pro214-amide-L215                    | -1.13                    | 0.05               | -0.62                    | -0.01                    | -0.39                | -2.1            | -0.70                 |
| L209-sidechain                       | -0.95                    | 2.21               | -0.11                    | -0.14                    | -2.89                | -1.89           | -0.47                 |
| A128-amide-T129                      | -0.89                    | 2.36               | -1.01                    | -0.05                    | -2.12                | -1.71           | -0.57                 |
| I124-amide-L125                      | -0.65                    | 0.4                | -0.55                    | -0.02                    | -0.85                | -1.68           | -0.56                 |
| W213-amide-Pro214 + Pro214-sidechain | -2.22                    | 8.48               | -1                       | -0.24                    | -6.66                | -1.63           | -0.23                 |
| V168-sidechain                       | -0.51                    | 2.7                | -0.05                    | -0.06                    | -3.66                | -1.48           | -0.49                 |
| I164-amide-A165                      | -0.03                    | 0                  | 0.05                     | 0                        | -0.114               | -0.94           | -0.31                 |
| T217-amide-L218                      | 0.1                      | 0.1                | -0.54                    | -0.02                    | -0.52                | -0.87           | -0.29                 |
| A169-sidechain                       | -0.59                    | 0.77               | -0.1                     | -0.08                    | -0.81                | -0.8            | -0.8                  |
| L212-amide-W213                      | -0.2                     | 0                  | -0.23                    | 0                        | -0.04                | -0.47           | -0.16                 |
| Y121-amide-A122                      | -0.27                    | 0                  | -0.07                    | 0                        | -0.08                | -0.41           | -0.13                 |
| A165-sidechain                       | 0.07                     | 0.06               | -0.03                    | -0.02                    | -0.36                | -0.29           | -0.29                 |
| M120-amide-Y121                      | -0.16                    | 0                  | -0.09                    | 0                        | -0.02                | -0.28           | -0.09                 |
| Y121-sidechain                       | 0.39                     | 0.14               | 0.1                      | -0.03                    | -0.83                | -0.24           | -0.03                 |
| V208-amide-L209                      | 0                        | 0.03               | -0.04                    | -0.01                    | -0.2                 | -0.21           | -0.07                 |
| A167-amide-V168                      | 0.11                     | 0                  | 0.03                     | 0                        | -0.11                | 0.02            | 0.00                  |
| L216-amide-T217                      | 0.09                     | 0                  | 0.22                     | 0                        | -0.13                | 0.17            | 0.06                  |
| A169-amide-W170                      | 0.21                     | 0                  | 0.11                     | 0                        | 0.15                 | 0.18            | 0.06                  |
| T129-amide-I130                      | 0.24                     | 0.02               | 0.32                     | 0                        | -0.19                | 0.39            | 0.13                  |
| V168-amide-A169                      | 1.09                     | 0.32               | 0.21                     | -0.05                    | -0.86                | 0.71            | 0.24                  |

\*L→R/ R→L: Ligand→Receptor/Receptor→Ligand; \*\*Total/N is fragment efficiency

**Table S12. The decomposition of the pairwise interaction energy between the C5aR1 receptor fragments and the NDT9513727 and benzdioxole (BDO) fragments derived from SAPT0 calculations.**

| Receptor Fragment | Ligand Fragment | Electrostatics, kcal/mol | Exchange, kcal/mol | Induction L→R, kcal/mol | Induction R→L, kcal/mol | Dispersion, kcal/mol | Total, kcal/mol |
|-------------------|-----------------|--------------------------|--------------------|-------------------------|-------------------------|----------------------|-----------------|
| A156-amide-T157   | BDO             | -3.89                    | 2.82               | -0.34                   | -0.26                   | -1.30                | -2.97           |
| T129-sidechain    | BDO             | -2.55                    | 1.50               | -0.37                   | -0.133                  | -1.02                | -2.58           |
| L209-amide-G210   | BDO             | -5.23                    | 4.60               | -0.72                   | -0.19                   | -0.98                | -3.52           |

**Table S13.  $Q^{CT}$  devised from natural population analysis for atom-pairwise contacts in the NDT9513727-C5aR1 complex, the distance and angle of these contacts from the X-ray and optimized structures.**

| Two atom contact (receptor-ligand) | Interacting orbitals    | $Q^{CT}$ , a.u. | Optimized distance, Å | Optimized angle, ° (expected from VSEPR <sup>**</sup> ) | X-ray distance, Å | X-ray angle, ° | VdW sum, Å |
|------------------------------------|-------------------------|-----------------|-----------------------|---------------------------------------------------------|-------------------|----------------|------------|
| A156(O-H)C <sup>sp3</sup>          | n(O) -> $\sigma^*(H-C)$ | 0.0031          | 2.32                  | 129 (120)                                               | 2.31              | 129            | 2.72       |
| T129H(O-H)C <sup>sp3</sup>         | n(O) -> $\sigma^*(H-C)$ | 0.0011          | 2.54                  | 142 (120)                                               | 2.36              | 145            | 2.72       |
| L209(O-H)C <sup>sp3</sup>          | n(O) -> $\sigma^*(C-O)$ | 0.0018          | 2.44                  | 118 (120)                                               | 2.52              | 143            | 2.72       |
| W213N(H-N) <sup>sp2</sup>          | n(N) -> $\sigma^*(H-N)$ | 0.0572          | 1.81                  | 121 (120)                                               | 1.90              | 115            | 2.75       |
| T217H(O-H)C <sup>sp2</sup>         | n(O) -> $\sigma^*(H-C)$ | 0.0027          | 2.37                  | 128 (120)                                               | 2.06              | 148            | 2.72       |

<sup>\*\*</sup>VSEPR – Valence shell electron pair repulsion (VSEPR) theory

**Table S14. The average ligand-residue interaction energy, involving van der Waals and electrostatic components in GCGR from the MD simulations in different lipid compositions.**

| Residue                      | POPC                           |                                |                                  | DMPC                           |                                |                                  | POPC + Cholesterol             |                                |                                  |
|------------------------------|--------------------------------|--------------------------------|----------------------------------|--------------------------------|--------------------------------|----------------------------------|--------------------------------|--------------------------------|----------------------------------|
|                              | $E_{\text{vdW}}$ ,<br>kcal/mol | $E_{\text{ele}}$ ,<br>kcal/mol | $E_{\text{total}}$ ,<br>kcal/mol | $E_{\text{vdW}}$ ,<br>kcal/mol | $E_{\text{ele}}$ ,<br>kcal/mol | $E_{\text{total}}$ ,<br>kcal/mol | $E_{\text{vdW}}$ ,<br>kcal/mol | $E_{\text{ele}}$ ,<br>kcal/mol | $E_{\text{total}}$ ,<br>kcal/mol |
| <b>R346</b> <sup>6.37b</sup> | -1.0                           | -80.8                          | -81.8                            | -0.8                           | -77.3                          | -78.2                            | -69.1                          | -0.5                           | -69.5                            |
| <b>K405</b> <sup>8.48b</sup> | -0.8                           | -47.9                          | -48.7                            | -0.9                           | -30.8                          | -31.7                            | -16.9                          | -0.9                           | -17.8                            |
| <b>N404</b> <sup>8.47b</sup> | -0.6                           | -30.9                          | -31.5                            | -0.5                           | -34.8                          | -35.4                            | -37.6                          | -0.9                           | -38.5                            |
| <b>K349</b> <sup>6.40b</sup> | -10.3                          | -16.8                          | -27.1                            | -10.2                          | -13.4                          | -23.6                            | -11.4                          | -10.2                          | -21.6                            |
| <b>S350</b> <sup>6.41b</sup> | -2.2                           | -8.4                           | -10.6                            | -2.2                           | -7.4                           | -9.7                             | -8.9                           | -2.2                           | -11.2                            |
| <b>F345</b> <sup>6.36b</sup> | -1.8                           | -2.3                           | -4.0                             | -1.8                           | -2.1                           | -3.9                             | -1.6                           | -2.2                           | -3.8                             |
| <b>T353</b> <sup>6.44b</sup> | -2.6                           | 0.4                            | -2.2                             | -2.8                           | 0.4                            | -2.4                             | 0.2                            | -2.7                           | -2.5                             |
| <b>L347</b> <sup>6.38b</sup> | -0.7                           | -0.8                           | -1.5                             | -1.1                           | -1.0                           | -2.1                             | -0.7                           | -1.6                           | -2.2                             |
| <b>A348</b> <sup>6.39b</sup> | -1.2                           | -0.1                           | -1.3                             | -1.2                           | -0.1                           | -1.3                             | 0.3                            | -1.3                           | -1.0                             |
| <b>Lipid tail</b>            | -7.0                           | -0.1                           | -7.1                             | -8.4                           | -0.2                           | -8.6                             | -8.6                           | -0.2                           | -8.8                             |
| <b>Lipid tail</b>            | -4.8                           | -0.2                           | -5.0                             | -3.6                           | -0.1                           | -3.7                             | -3.6                           | -0.9                           | -4.6                             |
| <b>Lipid tail</b>            | -4.5                           | -0.2                           | -4.7                             | -3.0                           | 0                              | -3.0                             | -3.3                           | -0.1                           | -3.4                             |
| <b>Lipid tail</b>            | -2.6                           | 0                              | -2.7                             | -1.7                           | 0                              | -1.7                             | -2.4                           | -0.1                           | -2.5                             |
| <b>Lipid tail</b>            | -1.7                           | 0                              | -1.7                             | -2.2                           | 0.6                            | -1.7                             | -1.0                           | 0                              | -1.0                             |
| <b>Headgroup</b>             | -1.5                           | -2.4                           | -3.9                             | -2.2                           | -3.4                           | -5.6                             | -1.1                           | -1.4                           | -2.5                             |

**Table S15. The decomposition of the pairwise interaction energy of a GCGR residue backbone or sidechain and MK-0893 derived from SAPT0 calculations. N is a number of non-hydrogen atoms in a protein fragment.**

| Receptor Fragment | Electrostatics, kcal/mol | Exchange, kcal/mol | Induction L→R*, kcal/mol | Induction R→L*, kcal/mol | Dispersion, kcal/mol | Total, kcal/mol | Total / N**, kcal/mol |
|-------------------|--------------------------|--------------------|--------------------------|--------------------------|----------------------|-----------------|-----------------------|
| K349-sidechain    | -98.41                   | 56.24              | -34.98                   | -2.74                    | -20.85               | -100.73         | -16.8                 |
| R346-sidechain    | -85.83                   | 26.34              | -8.35                    | -9.89                    | -7.77                | -85.5           | -12.2                 |
| K405-sidechain    | -39.75                   | 0.19               | -2.75                    | -1.56                    | -0.51                | -44.38          | -7.4                  |
| N404-sidechain    | -27.5                    | 17.88              | -2.06                    | -5.77                    | -4.54                | -21.9           | -5.5                  |
| N404-amide-K405   | -14.86                   | 1.24               | -0.77                    | -1.78                    | -1.01                | -17.17          | -5.7                  |
| K405-amide-E406   | -7.04                    | 0                  | -0.17                    | -0.37                    | -0.07                | -7.64           | -2.55                 |
| A348-amide-K349   | -2.98                    | 0.55               | -2.31                    | 0.07                     | -1.94                | -6.74           | -2.25                 |
| F345-amide-R346   | -3.87                    | 0.78               | 0.27                     | -0.38                    | -1.02                | -4.22           | -1.41                 |
| T353-sidechain    | -6.12                    | 13.26              | -2.569                   | -0.4                     | -7.8                 | -3.63           | -1.23                 |
| R347-amide-A348   | -1.97                    | 0                  | -1.06                    | -0.12                    | -0.24                | -3.38           | -1.13                 |
| S350-amide-T351   | -1.02                    | 0.01               | -1.7                     | -0.04                    | -0.36                | -3.1            | -1.03                 |
| F345-sidechain    | -1.95                    | 4.93               | 0.14                     | -0.57                    | -5.2                 | -2.64           | -0.38                 |
| S350-sidechain    | -8.32                    | 12.79              | -0.73                    | -1.36                    | -4.39                | -2.01           | -1.00                 |
| L352-amide-T353   | -1.55                    | 0.02               | 0.26                     | -0.02                    | -0.49                | -1.77           | -0.59                 |
| A348-sidechain    | -0.69                    | 0.7                | 0.11                     | -0.03                    | -1                   | -0.92           | -0.92                 |
| L347-sidechain    | -0.2                     | 0                  | 0.104                    | -0.42                    | -0.16                | -0.68           | -0.17                 |
| A344-amide-F345   | 0.21                     | 0                  | -0.34                    | -0.07                    | -0.1                 | -0.3            | -0.1                  |
| S352-amide-L354   | -0.18                    | 0.03               | 0.16                     | 0                        | -0.13                | -0.12           | -0.04                 |
| K349-amide-S350   | -3.1                     | 8.04               | 1.76                     | -0.45                    | -4.94                | 1.32            | 0.44                  |
| R346-amide-L347   | 1.35                     | 1.08               | 1.62                     | -0.54                    | -1.4                 | 2.11            | 0.70                  |
| L403-amide-N404   | 5.29                     | 6.97               | 0.79                     | -0.8                     | -3.2                 | 9.05            | 3.02                  |
| E406-sidechain    | 63.59                    | 0.06               | 3.71                     | -0.84                    | -0.16                | 66.36           | 13.27                 |

\*L→R/ R→L: Ligand→Receptor/Receptor→Ligand; \*\*Total/N is fragment efficiency

**Table S16.  $Q^{CT}$  devised from natural population analysis for atom-pairwise contacts in the MK-0893-GCGR complex, the distance and angle of these contacts from the X-ray and optimized structures.**

| Two atoms<br>(receptor-<br>ligand)     | Interacting<br>orbitals        | $Q^{CT}$ ,<br>a.u. | Optimized<br>distance,<br>Å | Optimized<br>angle, °<br>(expected<br>from<br>VSEPR*) | X-ray<br>distance,<br>Å | X-ray<br>angle,<br>° | VdW<br>sum<br>, Å |
|----------------------------------------|--------------------------------|--------------------|-----------------------------|-------------------------------------------------------|-------------------------|----------------------|-------------------|
| R346N(H <sup>+</sup> -O <sup>-</sup> ) | n(O) -> $\sigma^*(\text{H-N})$ | 0.0491             | 1.79                        | 115 (120)                                             | 1.63                    | 149                  | 2.72              |
| N404N(H-O <sup>-</sup> )               | n(O) -> $\sigma^*(\text{H-N})$ | 0.0447             | 1.74                        | 139 (120)                                             | 1.73                    | 102                  | 2.72              |
| K405N(H-O <sup>-</sup> )               | n(O) -> $\sigma^*(\text{H-N})$ | 0.0066             | 2.54                        | 106 (120)                                             | 2.15                    | 106                  | 2.72              |
| S350H(O-H)N                            | n(O) -> $\sigma^*(\text{H-N})$ | 0.0219             | 1.91                        | 163 (104)                                             | 2.14                    | 157                  | 2.72              |
| T353H(O-H)C <sup>sp2</sup>             | n(O) -> $\sigma^*(\text{H-C})$ | 0.0027             | 2.46                        | 161 (104)                                             | 3.11                    | 113                  | 2.72              |

\*VSEPR – Valence shell electron pair repulsion (VSEPR) theory

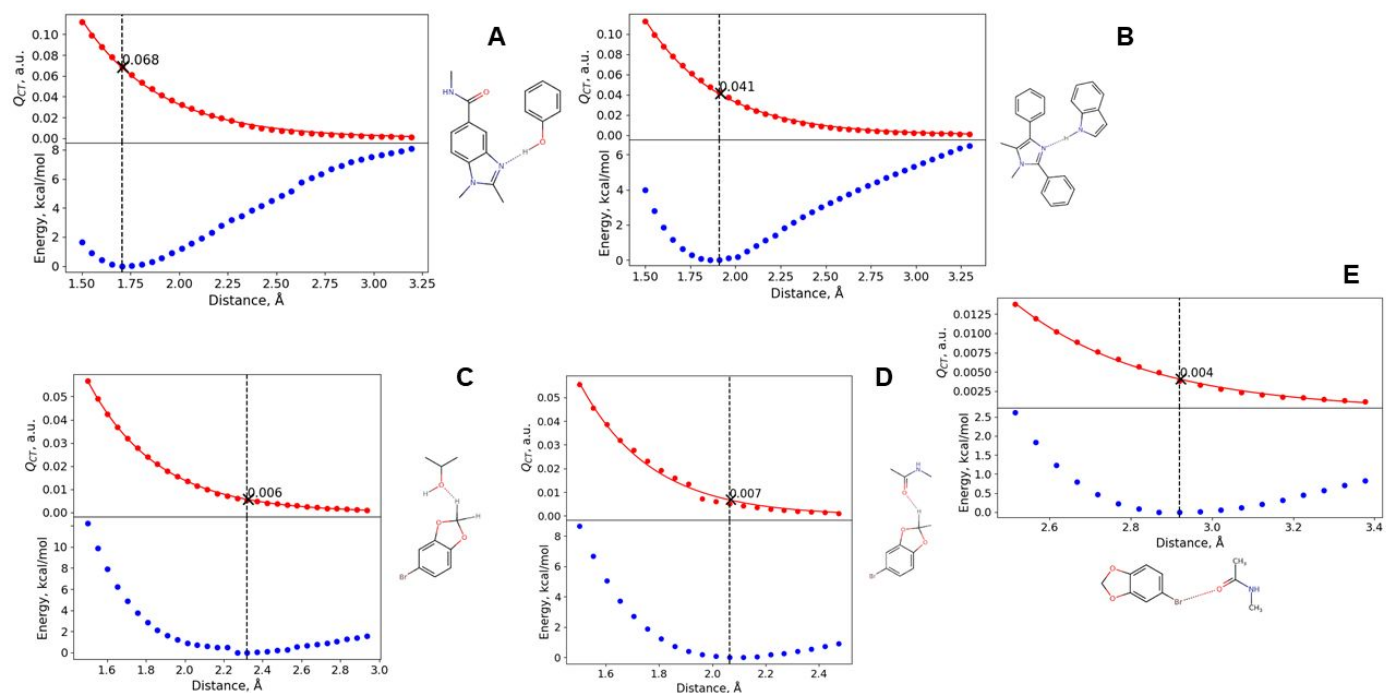

**Figure S1. The charge transfer values ( $Q_{CT}$ ) for optimal geometries of the reference complexes.** The distance between interacting atoms was varied to find the optimum geometry while the angle defining the hydrogen bond geometry was constrained as expected from the valence shell electron pair repulsion (VSEPR) theory:  $120^\circ$  was set for C=O---H, C=O---Br, and C=N(C)---H angles, while  $109^\circ$  was for C-O(-H)---H.  $Q_{CT}$  is shown for the optimal geometry.

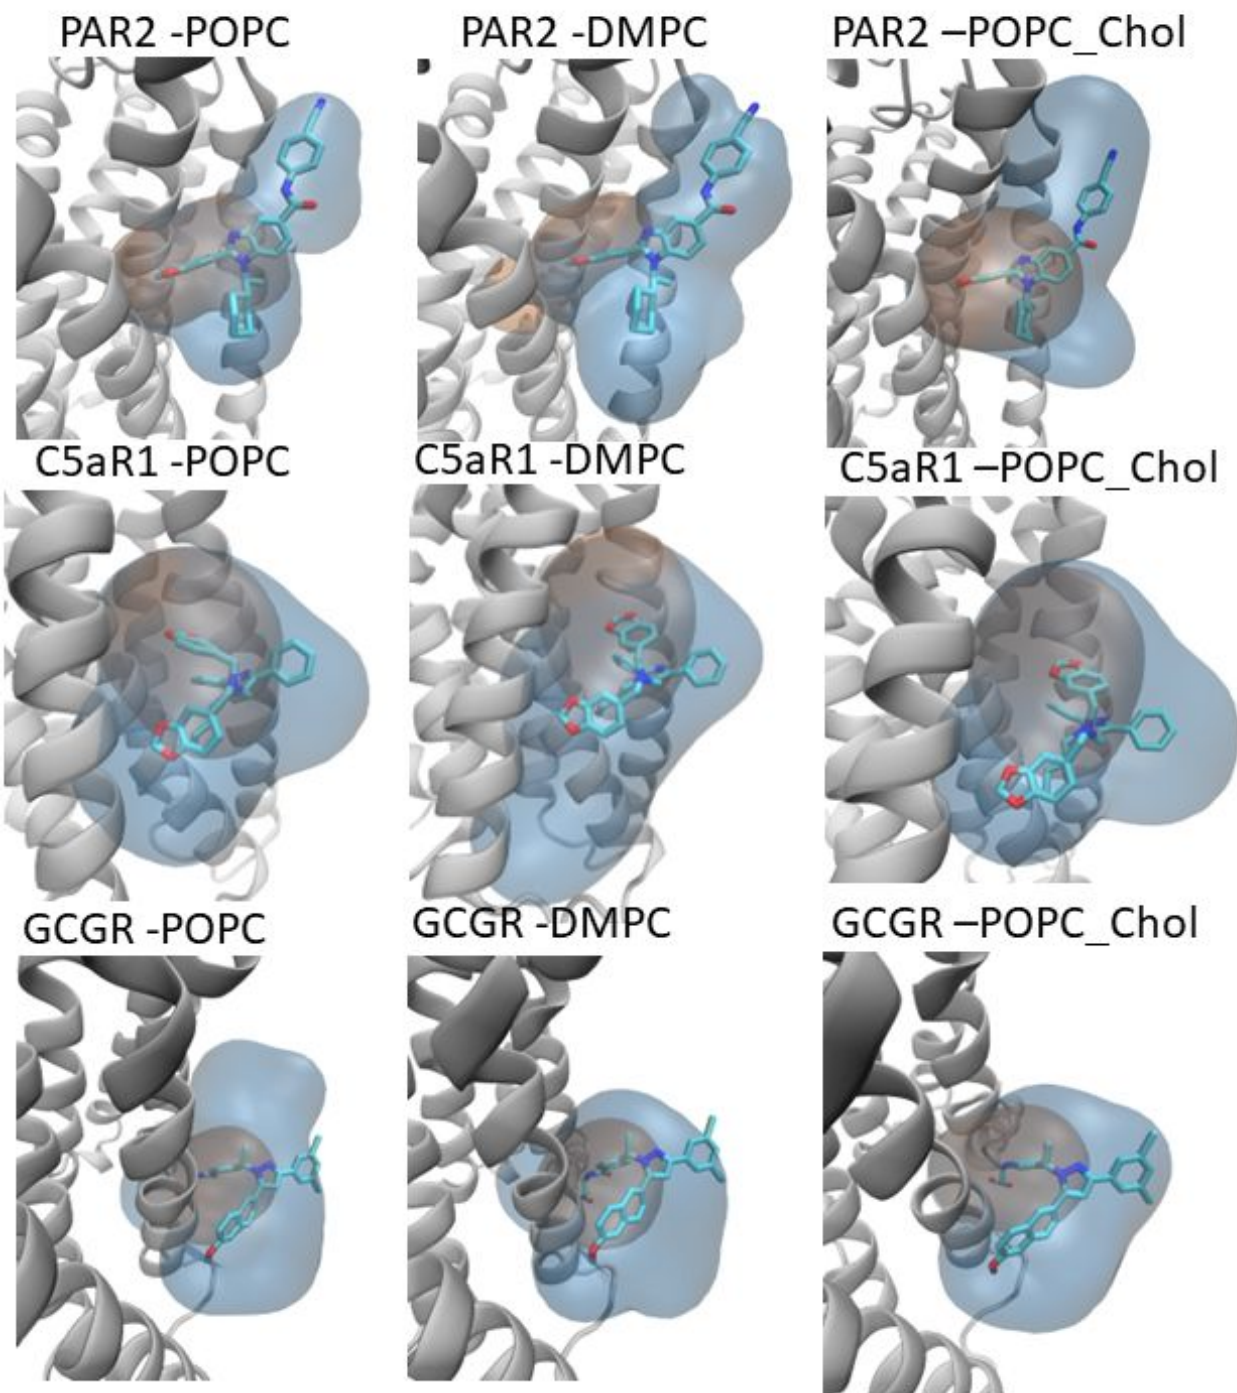

**Figure S2.** The overlay of the allosteric cavities from MDpocket calculation with selection of only receptor atoms (orange surface) and receptor-lipid atoms (blue surface).

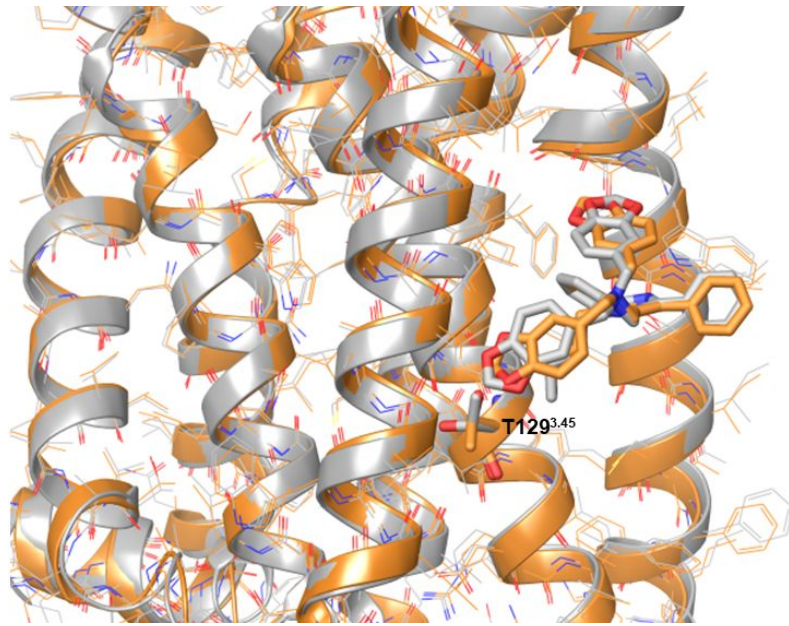

**Figure S3.** The overlay of the C5aR1 crystal structures with PDB ID 5O9H, Chain A (grey) and 6C1Q (orange).
